# Supplementary material for: Determining the emotional regulation function of Bifidobacterium breve: the role of gut metabolite regulation over colonization capability
Source: Royal Society of Chemistry journal article supplement (doi:10.1039/d3fo02739b), 2024-01-01
Supplement: d3fo02739b1.xlsx [file d3fo02739b1.xlsx]

## Sheet: Fig. 1
Fig. 1B	CCFM1025								FHLJDQ3M5
0d	5	5	5	5	5	5	5	5	5	5	5	5	5	5	5	5
7d	7.80193	6.12648	5.8466	7.19256	6.53932	6.53841	6.22823	8.83736	5.92009	6.269	6.34114	6.3312	8.12557	6.08105	6.10033	9.00922
14d	9.34518	8.38218	8.64074	8.59957	6.4384	8.27998	7.29493	6.60594	8.59084	8.17249	7.9344	8.47303	8.15381	8.45954	8.19688	7.22815
1d	4.7051	6.09438	5.98213	5.60173	6.84147	5.76681	5.51504	5.55025	5.90046	5.5119	5.4448	5.46634	6.23409	5.41575	6.17533	5.74198
4d	5	5	5	5	5	5	5	5	5	5	5	5	5	5	5	5.65532
7d	5	5	5	5	5	5	5	5	5	5	5	5	5	5	5	5
14d	5	5	5	5	5	5	5	5	5	5	5	5	5	5	5	5
Fig. 1C	CCFM1025					FHLJDQ3M5
0d	5.65942	5.52815	5.60663	6.10026	5.01129	5.69733	5.58476	5.76548	5.37409	5.86113
21d	5	5	5	5	5	5	5	5	5	5
28d	8.98471	9.15787	8.88449	8.94624	8.87309	9.48565	8.9542	9.54701	8.46503	8.31917
1d	8.83497	8.86284	8.73496	8.49675	8.34698	8.66496	8.69728	8.77206	8.54573	8.67002
4d	7.11623	8.02145	6.84451	7.95731	7.05778	8.35283	8.13128	8.45783	6.91746	7.32549
7d	5.86759	5.49087	5.69753	5.59452	5.52907	5.40295	5.3788	5.47685	5.14721	5.53719
14d	5.10555	5.85905	5.13914	5.66174	5.70516	5.2503	5.14007	5.91745	5.12127	5.29946

## Sheet: Fig. 2
Fig. 2A	Control	CUMS	FHLJDQ3M5	1025-low	1025-mid	1025-high
	18.899	9.91754	4.63561	10.2741	16.5662	18.0782
	14.8206	6.19568	7.80031	6.64141	13.5075	19.2849
	17.4058	9.93983	12.0348	13.4834	20.1161	15.9553
	10.9427	13.3274	7.51059	8.04546	20.4287	26.4627
	13.2828	10.5861	8.31285	12.0385	24.5598	13.4658
	16.7818	4.70247	10.5475	16.6256	14.9097	24.0286
Fig. 2B	Control	CUMS	FHLJDQ3M5	1025-low	1025-mid	1025-high
	8.24465	6.02139	8.22193	11.0963	5.74866	9.89305
	7.70722	4.60659	7.38636	2.74064	10.5615	14.6056
	9.9318	3.74332	4.17781	13.9706	9.15775	9.12433
	15.8088	4.27273	6.91845	3.60963	12.1658	15.508
	7.95455	3.92948	4.34492	2.64037	11.0963	8.82353
	7.78743	5.25	5.31417	10.3944	13.0682	7.98797
Fig. 2C	Control	CUMS	FHLJDQ3M5	1025-low	1025-mid	1025-high
	21.0227	35.5949	35.6618	24.5655	17.9144	16.5441
	29.238	32.9612	30.7821	28.3155	19.7861	19.2179
	26.2634	33.9305	33.6564	37.3128	33.4893	23.7968
	26.377	41.3102	44.7193	34.4719	26.7714	27.7072
	25.5949	47.0789	44.619	21.0561	16.5441	24.3984
	26.631	29.1444	31.6511	21.0562	29.9465	20.7553
Fig. 2D	Control	CUMS	FHLJDQ3M5	1025-low	1025-mid	1025-high
	62.1	11.9	12.9	20.8	14.7	46.1
	21.2	7.8	8.1	10.1	10.3	15.4
	22.1	8.5	7.7	27.3	32.1	24.2
	27	9.8	8.2	29.1	18.8	28.3
	41.1	13	8.2	10.4	38.7	49.3
	12.1	5.8	15.8	25.9	35.1	60.3
Fig. 2E	Control	CUMS	FHLJDQ3M5	1025-low	1025-mid	1025-high
	34.4882	66.3944	66.5976	15.5884	16.6045	13.5561
	14.5722	99.7231	47.0881	64.3621	38.7559	16.198
	27.5786	50.3397	38.7559	57.0461	49.1203	39.772
	25.1399	94.236	74.1169	51.4408	5.83361	NS
	21.8883	107.649	72.2879	6.24006	35.9108	28.2234
	30.6269	50.9493	80.2136	NS	26.9689	34.285
Fig. 2F	Control	CUMS	FHLJDQ3M5	1025-low	1025-mid	1025-high
	1.09719	0.580516	0.821796	0.80395	0.878126	1.05519
	0.950638	0.977725	1.03347	0.861032	1.15869	0.956546
	0.926041	0.597703	0.701007	0.82264	0.92395	0.999683
	1.14279	0.657676	0.828528	0.730775	0.964264	0.984205
	0.883335	0.583377	0.985402	0.761555	0.983518	1.03839
Fig. 2G	Control	CUMS	FHLJDQ3M5	1025-low	1025-mid	1025-high
	1.12079	1.20045	1.05232	1.30045	0.989259	1.02599
	1.25219	1.44751	1.63006	1.4425	0.965021	1.15955
	0.893638	1.82585	1.50898	0.936405	0.962374	0.816943
	0.836041	1.97735	1.7757	0.916268	1.08566	1.01728
	0.917335	1.3459	1.12785	1.22072	1.32737	0.89901
Fig. 2H	Control	CUMS	FHLJDQ3M5	1025-low	1025-mid	1025-high
	0.893335	0.37282	0.675328	0.81346	1.63257	1.37282
	1.13279	0.436087	0.684293	1.23725	0.766917	1.09213
	0.963041	0.64764	0.643111	0.723038	0.853902	1.2076
	1.09719	0.643923	1.39022	1.12673	1.17458	1.06595
	0.913638	0.904963	1.00845	0.791216	1.28089	1.17051

## Sheet: Fig. 3
Fig. 3A	Control	CUMS	FHLJDQ3M5	1025-low	1025-mid	1025-high
	5.47293	5.3774	5.77973	5.64963	5.88387	5.7603
	6.05903	4.87061	5.89407	5.08002	5.75805	6.06011
	5.1145	4.6064	5.35996	5.88246	5.8478	5.68464
	6.01936	4.8509	4.92604	4.97506	5.39776	6.33217
	5.96944	5.31817	5.03619	5.30117	6.05412	5.82118
	6.16315	5.37719	5.95001	5.09465	5.51345	5.6536
Fig. 3B	Control	CUMS	FHLJDQ3M5	1025-low	1025-mid	1025-high
	0.95852	0.942241	0.952104	0.940199	0.959804	0.959787
	0.967379	0.919274	0.960493	0.923882	0.960714	0.973228
	0.937486	0.861901	0.934334	0.965041	0.960723	0.953347
	0.963694	0.931905	0.908906	0.912044	0.940609	0.978357
	0.968977	0.948202	0.900221	0.930677	0.968292	0.951503
	0.95884	0.940253	0.967981	0.912877	0.953716	0.956195
Fig. 3C	#OTU ID	Control	Control	Control	Control	Control	Control	CUMS	CUMS	CUMS	CUMS	CUMS	CUMS	FHLJDQ3M5	FHLJDQ3M6	FHLJDQ3M7	FHLJDQ3M8	FHLJDQ3M9	FHLJDQ3M10	1025-low	1026-low	1027-low	1028-low	1029-low	1030-low	1025-mid	1026-mid	1027-mid	1028-mid	1029-mid	1030-mid	1025-high	1026-high	1027-high	1028-high	1029-high	1030-high
	k__Bacteria;p__Actinobacteria;c__Actinobacteria;o__Bifidobacteriales;f__Bifidobacteriaceae;g__Bifidobacterium	0	0	0.000251114	0	0	0.000448612	0.0136559	0.0484264	0.0216005	0.0662105	0.0443202	0.0077147	0.0252632	0.00221465	0.0055666	0.00519625	0.00708556	0.00559555	0.00764165	0.0539665	0.00234442	0.00196175	0.0254705	0.0277263	0.0128514	0.00804755	0.0125664	0.0100291	0.00840765	0.0301075	0.0105717	0.00596763	0.0165177	0.00476484	0.00253921	0.0958249
	k__Bacteria;p__Actinobacteria;c__Actinobacteria;o__Corynebacteriales;f__Nocardiaceae;g__Rhodococcus	0	0	0	0	0	0	0.000278691	0	0	0.000395523	0	0.000388161	0.000814941	0.000312323	0	0.000371161	0.000200535	0.000596859	0.000365824	0.00124576	0	0.00102174	0.00052594	0.000424776	0.00067639	0.000734631	0.000493546	0.000531134	0.000353593	0.000304116	0	0.00037087	0.00100645	0.000168171	0	0.000302764
	k__Bacteria;p__Actinobacteria;c__Coriobacteriia;o__Coriobacteriales;f__Atopobiaceae;g__Coriobacteriaceae UCG-002	0.00201146	0.00606028	0.00188336	0.000305477	0	0.000807501	0.0147149	0.0241681	0.00302683	0.0203694	0.0724863	0.00257157	0.0101188	0.00275412	0.00616302	0.0139185	0.0135027	0.0286492	0.00223559	0.0275563	0.00426258	0.00130783	0.0074383	0.0128205	0.00270556	0.0449461	0.0180714	0.0306808	0.0295447	0.0548084	0.0646143	0.0646662	0.080457	0.0450698	0.0102315	0.0380272
	k__Bacteria;p__Actinobacteria;c__Coriobacteriia;o__Coriobacteriales;f__Coriobacteriales Incertae Sedis;g__uncultured	0	0	0	0	0	0	0	0	0	0	0	0	0.000203735	0.000113572	0	0	0	0.000186518	0	0.000398645	0.000319693	0.000245218	0	0	0	0	0.000113895	0	0.000157152	0	0	0	0	0.000280285	0	0
	k__Bacteria;p__Actinobacteria;c__Coriobacteriia;o__Coriobacteriales;f__Eggerthellaceae;g__Adlercreutzia	0.00249909	0.003486	0.00445728	0.00130919	0.00308132	0.00475528	0.0188395	0.00495987	0.00348544	0.00308508	0.00683442	0.0079573	0.00716469	0.00891539	0.00536779	0.00547462	0.00314171	0.0112284	0.00447118	0.012956	0.00303708	0.0126287	0.00589804	0.0067578	0.00388924	0.00574348	0.00360668	0.0031868	0.00302518	0.00334527	0.00469384	0.00853001	0.00864366	0.0130052	0.0029873	0.00442036
	k__Bacteria;p__Actinobacteria;c__Coriobacteriia;o__Coriobacteriales;f__Eggerthellaceae;g__Enterorhabdus	0.00426673	0.0137295	0.00138113	0.00174558	0.0134526	0.0092414	0.0205674	0.00315628	0.00192616	0.00102836	0.00610956	0.00611354	0.0147029	0.0157013	0.00616302	0.0156815	0.00548128	0.0307009	0.00581254	0.02058	0.00175831	0.0144679	0.00822721	0.00876583	0.00980765	0.00647811	0.00425209	0.00343675	0.00443956	0.0036156	0.00706191	0.0185435	0.00580191	0.0207971	0.00410754	0.00381483
	k__Bacteria;p__Bacteroidetes;c__Bacteroidia;o__Bacteroidales;f__Bacteroidaceae;g__Bacteroides	0.000975253	0.0151775	0.00213447	0.00292385	0.00300616	0.00578709	0.000390168	0	0.0035313	0.000395523	0.00455628	0.00116448	0.0026146	0.00346394	0.00238569	0	0.0032754	0.000820681	0.00536542	0	0.00660699	0.000817394	0.00300537	0.00428638	0.00718664	0.00223729	0.00429005	0.00190583	0.0019644	0.000574441	0.000592016	0.00812542	0.00355219	0.00695106	0.00873786	0.00493506
	k__Bacteria;p__Bacteroidetes;c__Bacteroidia;o__Bacteroidales;f__Marinifilaceae;g__Butyricimonas	0.00158479	0.00117988	0	0	0	0.00116639	0.000836074	0.000541077	0	0.000237314	0.000362431	0	0.000441426	0.000567859	0	0	0	0	0.000203236	0	0	0	0.000638642	0	0	0	0	0.00068735	0.000235729	0	0.000253721	0.000674309	0	0.000280285	0	0
	k__Bacteria;p__Bacteroidetes;c__Bacteroidia;o__Bacteroidales;f__Muribaculaceae;__	0.0150555	0.0167328	0.00772177	0.00798604	0.0109725	0.00646001	0.0026197	0.00811615	0.00729191	0.00213582	0.0146526	0.00616206	0.00879457	0.00667234	0.00457256	0.00491788	0.00822192	0.00820681	0.0124787	0.00548136	0.00309037	0.00645741	0.0161163	0.0133998	0.0101881	0.00357298	0.0711086	0.00787328	0.019369	0.00544029	0.0156039	0.0216116	0.00870286	0.0323449	0.0339059	0.0220412
	k__Bacteria;p__Bacteroidetes;c__Bacteroidia;o__Bacteroidales;f__Muribaculaceae;g__Muribaculum	0.00121907	0.00182345	0.000627786	0.00183286	0.00202916	0.00121125	0.000668859	0	0.000733777	0	0.000880191	0.000824842	0.000679117	0	0	0	0.000802139	0	0.00126006	0	0.000745951	0.000735655	0.00154025	0.00142879	0	0	0.00121488	0.000468647	0.00141437	0	0.0032138	0.000438301	0.00094725	0.0015696	0.00246453	0.00193769
	k__Bacteria;p__Bacteroidetes;c__Bacteroidia;o__Bacteroidales;f__Muribaculaceae;g__uncultured Bacteroidales bacterium	0.023528	0.108602	0.024672	0.0349116	0.0325417	0.0150733	0.00930829	0.0125349	0.00908049	0.00510224	0.0296158	0.00524017	0.0163667	0.0131459	0.0126243	0.0337756	0.0485294	0.0339837	0.0311763	0.0120092	0.0220588	0.0305297	0.0197228	0.00664195	0.0266328	0.008682	0.0301063	0.0142156	0.0326091	0.013719	0.0433863	0.0466285	0.00592031	0.0398004	0.0578043	0.0909807
	k__Bacteria;p__Bacteroidetes;c__Bacteroidia;o__Bacteroidales;f__Muribaculaceae;g__uncultured bacterium	0.243326	0.211144	0.178793	0.230155	0.270479	0.168005	0.156457	0.124267	0.114882	0.0622553	0.206741	0.137166	0.236197	0.196877	0.121074	0.220098	0.206952	0.182415	0.251484	0.130456	0.179135	0.16965	0.222473	0.212195	0.320271	0.138779	0.290623	0.137439	0.30079	0.227005	0.254356	0.225185	0.214789	0.302595	0.326139	0.205516
	k__Bacteria;p__Bacteroidetes;c__Bacteroidia;o__Bacteroidales;f__Prevotellaceae;g__Alloprevotella	0.0201146	0.00589939	0.00043945	0.0277984	0.0128513	0.0124714	0.00869517	0.00514023	0.0358175	0.0108373	0.0264057	0.0210577	0.0106282	0.0102499	0.0332008	0.00900065	0.0293449	0.00865446	0.0252825	0.00513255	0.097613	0.00506784	0.0188211	0.0243281	0.12843	0.0117541	0.022855	0.00965414	0.027541	0.0133473	0.00828823	0.0344909	0.0345154	0.00952968	0.00358477	0.0414181
	k__Bacteria;p__Bacteroidetes;c__Bacteroidia;o__Bacteroidales;f__Prevotellaceae;g__Prevotellaceae NK3B31 group	0.00280385	0	0	0.00200742	0.00105216	0	0	0	0.00334786	0	0.000465983	0.00262009	0.00505942	0.00218626	0.00149105	0.000927902	0	0.00070877	0	0	0.00548807	0	0	0.00019308	0.0018178	0.0087154	0.00174639	0.0043428	0.00648254	0.0036156	0.000761164	0.000775455	0.00728198	0.00100902	0	0
	k__Bacteria;p__Bacteroidetes;c__Bacteroidia;o__Bacteroidales;f__Prevotellaceae;g__Prevotellaceae UCG-001	0.00213337	0.00117988	0.00182058	0.00768056	0.00105216	0.00130097	0.000613121	0.00144287	0.0132997	0.000276866	0.00326188	0.00538574	0.00162988	0.00491198	0.00526839	0.00157743	0.00695187	0.000746074	0.00800748	0.000298983	0.0136402	0.00114435	0.0049213	0.0011971	0.00845487	0.0110195	0.0022779	0.00437404	0.00848623	0.00250051	0.00405954	0.00323668	0.00124327	0.00538147	0.012696	0.014351
	k__Bacteria;p__Bacteroidetes;c__Bacteroidia;o__Bacteroidales;f__Rikenellaceae;g__Alistipes	0.0466902	0.0319103	0.037981	0.0269256	0.0656095	0.0420349	0.008305	0.0065831	0.00252236	0.00142388	0.0122191	0.00533722	0.00186757	0.0164963	0.0196819	0.0038044	0.0322861	0.0193233	0.0131697	0.00592984	0.0249361	0.00396436	0.0195349	0.00826383	0.0382583	0.0136575	0.0232346	0.00968538	0.0456528	0.0176049	0.0123055	0.0237694	0.0105974	0.0204047	0.0210605	0.0126555
	k__Bacteria;p__Bacteroidetes;c__Bacteroidia;o__Bacteroidales;f__Rikenellaceae;g__Rikenellaceae RC9 gut group	0.000609533	0.00380779	0.00326449	0.00510583	0	0.000942084	0.00228527	0.00189377	0.000504471	0.00209627	0.0159988	0	0.000271647	0.000795003	0.00596422	0.00343324	0.00828877	0.00380498	0.00101618	0.00184373	0.00452899	0.000776524	0.0130358	0.000463392	0.0136123	0.0107189	0.00839028	0.00068735	0.00899698	0.00371697	0.00465156	0.0150371	0	0.00980997	0.0139656	0.0138666
	k__Bacteria;p__Bacteroidetes;c__Bacteroidia;o__Bacteroidales;f__Tannerellaceae;g__Parabacteroides	0	0.000375416	0.00043945	0.000218198	0.00037577	0	0	0	0	0	0.00025888	0.000339641	0.000203735	0.000113572	0	0	0.000735294	0	0.000691001	0	0.00335678	0	0.000864044	0.000231696	0.000338195	0.000400708	0.000569476	0.000312432	0	0.000202744	0	0.000809171	0.00165769	0	0.000821509	0.000817463
	k__Bacteria;p__Cyanobacteria;c__Melainabacteria;o__Gastranaerophilales;f__Candidatus Gastranaerophilales bacterium Zag_111;g__Candidatus Gastranaerophilales bacterium Zag_111	0	0	0	0	0	0	0	0	0	0	0	0	0	0	0	0	0	0	0	0	0.00191816	0	0.000112701	0	0.000338195	0	0	0	0	0	0	0	0	0	0	0
	k__Bacteria;p__Deferribacteres;c__Deferribacteres;o__Deferribacterales;f__Deferribacteraceae;g__Mucispirillum	0	0.00252065	0	0.00109099	0.00157824	0.00614598	0.000557383	0	0	0	0.000155328	0	0	0.000795003	0	0.000649531	0.00127005	0.000484948	0.000487765	0.000249153	0	0	0	0	0.000253646	0.00120212	0	0	0.000157152	0	0.000211434	0.000910317	0	0.000392399	0	0.000272488
	k__Bacteria;p__Firmicutes;c__Bacilli;o__Bacillales;f__Staphylococcaceae;g__Jeotgalicoccus	0	0	0	0	0	0	0	0.00423843	0	0.000949254	0	0.00106744	0	0	0	0	0	0	0	0	0	0	0	0	0	0.00300531	0	0.0269629	0.00640396	0.00101372	0	0	0	0	0	0
	k__Bacteria;p__Firmicutes;c__Bacilli;o__Bacillales;f__Staphylococcaceae;g__Staphylococcus	0	0	0	0	0	0	0.000836074	0	0	0.000553732	0	0.000873362	0.0116808	0.00371948	0.0148111	0.00649531	0.00334225	0.00395419	0.0014633	0.00657764	0.000852515	0.00306523	0.00364401	0.00231696	0.00934263	0.00778041	0.00379651	0.0138095	0.0128472	0.00821112	0.00528586	0.00701281	0.00929489	0.000896911	0.00306199	0.000756911
	k__Bacteria;p__Firmicutes;c__Bacilli;o__Lactobacillales;f__Aerococcaceae;g__Aerococcus	0	0	0	0	0	0	0.0104788	0	0	0.000711941	0.000414207	0.000824842	0.00057725	0	0	0	0	0	0	0	0	0	0	0	0	0.00156944	0	0.00246821	0.00157152	0	0	0	0	0	0.00134429	0.000272488
	k__Bacteria;p__Firmicutes;c__Bacilli;o__Lactobacillales;f__Enterococcaceae;g__Enterococcus	0.00396196	0.000911724	0.00138113	0.00139646	0	0.00278139	0.00858369	0.00369736	0.000825499	0.00138433	0.00186393	0.00334789	0.0187436	0.00343555	0.00298211	0.00231976	0.00153743	0.00313351	0.0227624	0.0159956	0.00969736	0.0402975	0.0102558	0.00861137	0	0.0593048	0.00569476	0.00449902	0.00333949	0.0133135	0.00672361	0.00674309	0.0128471	0	0.000522778	0.00990039
	k__Bacteria;p__Firmicutes;c__Bacilli;o__Lactobacillales;f__Lactobacillaceae;g__Lactobacillus	0.160063	0.0343237	0.0223492	0.0425922	0.134977	0.278633	0.134552	0.144017	0.410915	0.214927	0.111474	0.22067	0.0619694	0.0190801	0.039662	0.0702422	0.0634358	0.0968404	0.044915	0.174008	0.0481138	0.191761	0.0707765	0.0514751	0.116846	0.100978	0.040243	0.263817	0.183868	0.219909	0.0709997	0.144774	0.0894559	0.0378384	0.226886	0.0251294
	k__Bacteria;p__Firmicutes;c__Bacilli;o__Lactobacillales;f__Streptococcaceae;g__Streptococcus	0	0	0	0	0.000450924	0.000493473	0.000613121	0	0	0	0	0.000242601	0.000237691	0	0	0.000278371	0	0.000410341	0.000650354	0	0.000319693	0.000245218	0.000300537	0	0.000634115	0.000701239	0.000379651	0.000156216	0.000392881	0.000439278	0	0	0	0	0	0
	k__Bacteria;p__Firmicutes;c__Clostridia;o__Clostridiales;f__Christensenellaceae;g__Catabacter	0.000243813	0.000375416	0	0	0	0	0.000780336	0.000360718	0	0.000237314	0.000310655	0.000630762	0.000780985	0.00173197	0	0	0	0.000335733	0	0.0012956	0	0	0	0	0	0.0004341	0.000189825	0.000499891	0	0	0.000296008	0.000202293	0	0.000840854	0	0
	k__Bacteria;p__Firmicutes;c__Clostridia;o__Clostridiales;f__Clostridiaceae 1;g__Clostridium sensu stricto 1	0.000609533	0	0.00678009	0.000480035	0	0.000448612	0.00401315	0.00162323	0	0.00170075	0.000673087	0.015575	0.00237691	0.00110732	0.00337972	0.00204138	0.00153743	0.00149215	0.00121941	0.0011461	0	0	0.00247943	0.000695088	0.00287466	0.0324573	0.0106302	0.0254632	0.0180725	0.0219977	0.00393268	0.00380985	0.000414422	0.00072874	0	0.000666081
	k__Bacteria;p__Firmicutes;c__Clostridia;o__Clostridiales;f__Clostridiales vadinBB60 group;g__uncultured bacterium	0	0	0.000376671	0	0.000526078	0.00331972	0	0	0	0	0	0	0	0	0	0	0	0	0	0	0	0	0	0	0.000169097	0	0	0	0	0	0	0	0	0	0	0
	k__Bacteria;p__Firmicutes;c__Clostridia;o__Clostridiales;f__Family XIII;g__[Eubacterium] brachy group	0	0	0	0	0	0	0	0	0	0	0	0	0	0	0	0	0	0.00111911	0	0.00124576	0	0.000367827	0	0	0	0	0	0	0	0.000101372	0	0.000842886	0	0	0	0
	k__Bacteria;p__Firmicutes;c__Clostridia;o__Clostridiales;f__Family XIII;g__[Eubacterium] nodatum group	0	0	0	0.00096007	0	0	0.000167215	0	0	0	0	0	0	0.00028393	0	0	0	0	0.000487765	0	0	0	0	0	0	0.000267139	0	0	0	0	0	0	0	0	0	0
	k__Bacteria;p__Firmicutes;c__Clostridia;o__Clostridiales;f__Lachnospiraceae;__	0.00073144	0.00734742	0.0035156	0.0233908	0.0925898	0.0552241	0.00601973	0.000811615	0	0	0	0.000291121	0.000237691	0.0011925	0.00616302	0	0.00481283	0.00525982	0.00182912	0.00119593	0	0	0.00112702	0.000347544	0.000338195	0.000701239	0.000531511	0	0.00062861	0.000473069	0.000930311	0.000876601	0	0.00622232	0.000224048	0
	k__Bacteria;p__Firmicutes;c__Clostridia;o__Clostridiales;f__Lachnospiraceae;g__GCA-900066575	0	0.000589939	0	0	0	0	0	0	0	0	0	0	0	0	0	0	0	0	0	0	0	0	0	0	0	0	0.000721336	0	0.00110007	0	0.00105717	0	0	0	0	0
	k__Bacteria;p__Firmicutes;c__Clostridia;o__Clostridiales;f__Lachnospiraceae;g__Lachnoclostridium	0.00530294	0.00498766	0.00539896	0.00624045	0.0102961	0.0199632	0.0191182	0.0133466	0.00564091	0.00150299	0.00812882	0.0055313	0.00421053	0.0106758	0.0171968	0.0188364	0	0.0120864	0.00349565	0.0162448	0.00847187	0.0120566	0.00311807	0.00444084	0.00862397	0.00404047	0.00383447	0.0015934	0.00381095	0.00273704	0	0.0276467	0.00965011	0.0160323	0.0034354	0.00227073
	k__Bacteria;p__Firmicutes;c__Clostridia;o__Clostridiales;f__Lachnospiraceae;g__Lachnospiraceae NK4A136 group	0.0780202	0.0709536	0.197941	0.0854462	0.0241245	0.0521287	0.06304	0.028136	0.0118321	0.00893881	0.0476856	0.016982	0.0232258	0.0218626	0.00725646	0.0369305	0.00949198	0.0124221	0.0261361	0.0284533	0.0293052	0.0305705	0.00465833	0.0190377	0.0131051	0.0130898	0.0125285	0.00781079	0.0260873	0.0165574	0.0534083	0.0283884	0.0130247	0.0668199	0.0308439	0.00366345
	k__Bacteria;p__Firmicutes;c__Clostridia;o__Clostridiales;f__Lachnospiraceae;g__Lachnospiraceae NK4B4 group	0	0.000375416	0	0.00126555	0	0	0	0	0	0	0.00201926	0	0	0	0	0	0	0	0	0	0.000532822	0	0	0	0	0	0	0	0.00102149	0	0	0.00104518	0.00124327	0	0	0.00042387
	k__Bacteria;p__Firmicutes;c__Clostridia;o__Clostridiales;f__Lachnospiraceae;g__Lachnospiraceae UCG-001	0	0	0	0	0	0	0	0	0	0	0	0	0	0	0	0	0	0.000447644	0	0	0	0	0.000601074	0	0	0	0	0	0	0	0.00122632	0	0	0	0	0
	k__Bacteria;p__Firmicutes;c__Clostridia;o__Clostridiales;f__Lachnospiraceae;g__Lachnospiraceae UCG-006	0	0.00171619	0	0	0.000977003	0.00874793	0.0186723	0	0.000366888	0	0	0	0	0	0	0	0	0.00029843	0	0	0.00133205	0	0	0	0	0	0	0	0.00212156	0.000743394	0	0.000438301	0	0	0	0
	k__Bacteria;p__Firmicutes;c__Clostridia;o__Clostridiales;f__Lachnospiraceae;g__Marvinbryantia	0	0	0	0	0.00120247	0	0.000836074	0	0	0.00087015	0	0.00116448	0	0.00198751	0.00228628	0	0	0.000559555	0.00105682	0.000448475	0.00170503	0.000531306	0.000300537	0.00038616	0	0	0	0	0	0	0	0	0	0.00056057	0	0
	k__Bacteria;p__Firmicutes;c__Clostridia;o__Clostridiales;f__Lachnospiraceae;g__Roseburia	0.00201146	0	0.00269948	0.0079424	0.0450924	0.0163295	0.00267544	0	0.00233891	0.00087015	0.00108729	0.00320233	0	0.0016184	0	0.00343324	0.00106952	0.00264856	0.00312983	0.00199322	0.00154518	0.000858264	0	0.00239419	0	0	0.00208808	0	0.000785762	0.000777185	0.00156461	0.00482131	0.00159848	0.000448456	0.000746826	0
	k__Bacteria;p__Firmicutes;c__Clostridia;o__Clostridiales;f__Lachnospiraceae;g__[Eubacterium] fissicatena group	0.00158479	0	0.000565007	0.00135283	0.000977003	0.00650487	0	0.00514023	0.00843843	0.0035597	0.0040903	0.00208637	0.000441426	0.00150483	0.00119284	0	0	0	0.00134135	0	0.0127344	0	0	0.00278035	0	0	0	0.000843565	0	0.000405488	0	0.000472016	0.00787402	0.00224228	0	0
	k__Bacteria;p__Firmicutes;c__Clostridia;o__Clostridiales;f__Lachnospiraceae;g__[Eubacterium] ruminantium group	0.000853346	0.00101899	0.00226003	0.0162339	0.00127762	0.00596653	0.00178362	0.00207413	0.0183903	0.00893881	0.0015015	0	0	0	0	0	0	0	0	0	0.0127344	0	0	0	0	0.000500885	0	0	0	0	0	0.000539447	0	0.000672683	0	0
	k__Bacteria;p__Firmicutes;c__Clostridia;o__Clostridiales;f__Lachnospiraceae;g__[Eubacterium] ventriosum group	0	0	0	0.000523674	0.000676387	0.000807501	0	0	0	0.000197761	0	0	0	0	0	0	0	0.000447644	0.000731648	0	0.000372975	0	0.000225403	0.000617856	0.000422744	0.000267139	0	0	0	0	0	0.000269724	0.000473625	0	0	0
	k__Bacteria;p__Firmicutes;c__Clostridia;o__Clostridiales;f__Lachnospiraceae;g__[Eubacterium] xylanophilum group	0.00341339	0.00949265	0.00947957	0.00816059	0.0289343	0.0283074	0.00161641	0.00270538	0.00729191	0.00700075	0.00108729	0.00524017	0.000848896	0.00340715	0.00805169	0	0	0.0330511	0.00723518	0.00274068	0.0029838	0.00126696	0.000638642	0.0067578	0	0.000834808	0.00159453	0.000562377	0.00172868	0	0.00253721	0	0	0.00241045	0.00156833	0
	k__Bacteria;p__Firmicutes;c__Clostridia;o__Clostridiales;f__Lachnospiraceae;g__uncultured	0.00170669	0.00316422	0.00100446	0.0033166	0.00232978	0.0060114	0.00139346	0	0	0	0	0.000970403	0	0.000539466	0.000596421	0.00102069	0	0.00223822	0.00117877	0.000398645	0	0	0	0.000502008	0.000211372	0	0.000303721	0	0.000864338	0	0	0.0021915	0	0.00218622	0.000896191	0
	k__Bacteria;p__Firmicutes;c__Clostridia;o__Clostridiales;f__Peptostreptococcaceae;g__Romboutsia	0.000426673	0	0	0.00274929	0	0	0	0	0	0	0	0	0.0144992	0.00513912	0.0115308	0.0303424	0.0312834	0.0125713	0.00926754	0.00124576	0	0	0.00837748	0.0122413	0	0	0	0	0	0	0.0616965	0.0337154	0.0130247	0.0268513	0.0209858	0.0114142
	k__Bacteria;p__Firmicutes;c__Clostridia;o__Clostridiales;f__Ruminococcaceae;__	0.00115811	0.00359326	0	0.00253109	0.00488501	0.000672917	0.000668859	0	0.00490713	0.000791045	0.00155328	0.000824842	0.000543294	0.00144804	0.00238569	0	0	0	0.00178847	0.00119593	0.0216858	0.00143044	0.000939179	0.000810936	0.000549567	0.000200354	0.00136674	0.00568626	0.000707186	0.000743394	0.00164919	0.00411328	0.0018945	0.0080722	0	0.000544976
	k__Bacteria;p__Firmicutes;c__Clostridia;o__Clostridiales;f__Ruminococcaceae;g__Anaerotruncus	0	0	0	0	0	0.00152528	0.000167215	0	0	0	0	0	0	0	0	0	0	0	0	0	0	0	0	0	0	0	0	0	0.000157152	6.76e-05	0	0	0	0	0	0
	k__Bacteria;p__Firmicutes;c__Clostridia;o__Clostridiales;f__Ruminococcaceae;g__Intestinimonas	0	0	0	0	0.00172854	0	0	0.00135269	0	0.00209627	0	0.000485201	0	0.000567859	0	0	0	0	0	0	0	0	0	0	0	0	0	0	0	0	0	0	0.00438103	0	0	0
	k__Bacteria;p__Firmicutes;c__Clostridia;o__Clostridiales;f__Ruminococcaceae;g__Oscillibacter	0	0.000911724	0	0	0	0	0.00111476	0	0	0	0	0	0	0	0	0	0	0	0	0	0	0	0	0	0.000930036	0.000233746	0.000721336	0	0.00106078	0	0.000634303	0.000202293	0	0	0.000896191	0
	k__Bacteria;p__Firmicutes;c__Clostridia;o__Clostridiales;f__Ruminococcaceae;g__Ruminiclostridium	0	0.00375416	0	0.000436395	0	0	0.00144919	0	0	0	0	0	0	0	0	0	0.00106952	0.000596859	0	0	0.000639386	0	0	0.00115848	0.00067639	0.000166962	0.000493546	0	0.00149295	0	0	0	0	0	0.000746826	0
	k__Bacteria;p__Firmicutes;c__Clostridia;o__Clostridiales;f__Ruminococcaceae;g__Ruminiclostridium 5	0	0.00128714	0	0.00091643	0	0	0	0.000541077	0	0	0	0	0	0.00508234	0	0	0	0.000857985	0.000365824	0	0.00463555	0.000286088	0	0.00139018	0.00097231	0	0	0	0.000510745	0	0	0.00074174	0.000532828	0	0	0.000393594
	k__Bacteria;p__Firmicutes;c__Clostridia;o__Clostridiales;f__Ruminococcaceae;g__Ruminiclostridium 6	0.00451055	0.00659659	0.00125557	0.00174558	0.00105216	0.000583195	0	0	0	0.000158209	0	0	0	0.0101647	0	0	0	0	0.00117877	0.000199322	0.000639386	0.00196175	0.000300537	0.00196942	0.00105686	0.000367316	0.000379651	0	0	0.000878556	0	0	0.00224972	0	0	0
	k__Bacteria;p__Firmicutes;c__Clostridia;o__Clostridiales;f__Ruminococcaceae;g__Ruminiclostridium 9	0.00170669	0.00316422	0.000690564	0.00322933	0.00428378	0.00345431	0	0	0.00229305	0	0.00119085	0.000485201	0.000339559	0.000454287	0	0	0	0.000820681	0.000325177	0.000647797	0.00372975	0	0.00101431	0.00131294	0.00279011	0.000400708	0.000721336	0.000468647	0.00235729	0.000371697	0.00266407	0	0	0	0	0
	k__Bacteria;p__Firmicutes;c__Clostridia;o__Clostridiales;f__Ruminococcaceae;g__Ruminococcaceae NK4A214 group	0	0.000429046	0.00043945	0	0.00165339	0.00251222	0	0.000450897	0.000596194	0	0.000310655	0.000291121	0.000814941	0.000397501	0.000397614	0	0	0.000522252	0.000487765	0.000398645	0.00191816	0.000204349	0.00052594	0.00038616	0.00105686	0.000367316	0.000531511	0.000562377	0.000510745	0.000304116	0	0.00037087	0	0.000392399	0	0.000242211
	k__Bacteria;p__Firmicutes;c__Clostridia;o__Clostridiales;f__Ruminococcaceae;g__Ruminococcaceae UCG-004	0	0	0.000565007	0.000654593	0	0	0	0	0	0.000316418	0	0	0	0	0	0	0	0	0	0	0	0	0	0	0	0	0	0	0	0	0	0	0	0	0	0
	k__Bacteria;p__Firmicutes;c__Clostridia;o__Clostridiales;f__Ruminococcaceae;g__Ruminococcaceae UCG-005	0	0.00112625	0	0.000349116	0	0	0	0	0	0	0	0	0	0	0	0	0	0	0	0	0	0	0	0	0	0	0.000303721	0	0	0	0	0	0	0	0	0
	k__Bacteria;p__Firmicutes;c__Clostridia;o__Clostridiales;f__Ruminococcaceae;g__Ruminococcaceae UCG-009	0	0	0	0.000305477	0	0	0	0	0	0	0	0	0	0	0	0	0	0	0	0	0	0	0	0	0	0	0	0	0	0	0	0	0	0	0	0
	k__Bacteria;p__Firmicutes;c__Clostridia;o__Clostridiales;f__Ruminococcaceae;g__Ruminococcaceae UCG-010	0.000121907	0.000268154	0	0.000523674	0.000826695	0.000179445	0	0	0.00201789	0	0	0	0	0.000539466	0.00129225	0	0	0.000857985	0.000243883	0.000448475	0.000639386	0.000204349	0.000338104	0.000347544	0.000803213	0	0.000493546	0	0	0.000337906	0	0.000337154	0.000651234	0.000392399	0.000821509	0
	k__Bacteria;p__Firmicutes;c__Clostridia;o__Clostridiales;f__Ruminococcaceae;g__Ruminococcaceae UCG-013	0	0.000429046	0	0	0	0	0	0	0.000504471	0	0	0	0.000679117	0.00105054	0.000596421	0	0	0.000373037	0.000325177	0	0.000532822	0	0	0	0.00067639	0	0	0.000343675	7.86e-05	0	0	0.000236008	0	0.00056057	0	0
	k__Bacteria;p__Firmicutes;c__Clostridia;o__Clostridiales;f__Ruminococcaceae;g__Ruminococcaceae UCG-014	0.147995	0.178269	0.103585	0.200131	0.074628	0.0419452	0.0186166	0.207773	0.187847	0.293517	0.131252	0.219117	0.141868	0.182794	0.163817	0.0123411	0.0544118	0.104861	0.167588	0.0406618	0.276961	0.107651	0.0509411	0.0622876	0.0701754	0.192139	0.0506454	0.179242	0.0429812	0.13915	0.0960758	0.02441	0.158368	0.0682774	0.0957431	0.0294892
	k__Bacteria;p__Firmicutes;c__Clostridia;o__Clostridiales;f__Ruminococcaceae;g__Ruminococcus 1	0.000670486	0.000375416	0.00138113	0.00816059	0.00323163	0.00210847	0.00429184	0.000901795	0.00224719	0.0016612	0.000569535	0.000630762	0.00098472	0.000908575	0.00129225	0	0.000534759	0.00637893	0.00341436	0.00224238	0.00159847	0.000490436	0.000225403	0.000888168	0.00465018	0.00126891	0.000683371	0.000624863	0.00306447	0.000574441	0	0.00168577	0	0	0.000149365	0.000393594
	k__Bacteria;p__Firmicutes;c__Clostridia;o__Clostridiales;f__Ruminococcaceae;g__[Eubacterium] coprostanoligenes group	0	0	0.000565007	0.0122627	0	0.00228792	0.000501644	0.000901795	0.00151341	0.00197761	0	0	0	0.00318001	0	0	0	0	0	0	0.0014919	0	0	0.000231696	0	0.00150266	0	0.000812322	0	0.00128404	0	0	0	0	0	0
	k__Bacteria;p__Firmicutes;c__Clostridia;o__Clostridiales;f__Ruminococcaceae;g__uncultured	0	0.00134077	0	0.00109099	0	0	0.00195084	0	0	0	0.00134617	0	0	0.000369108	0	0	0	0	0	0	0.00165175	0	0	0	0.000760938	0	0.00106302	0	0	0	0	0	0	0	0	0
	k__Bacteria;p__Firmicutes;c__Erysipelotrichia;o__Erysipelotrichales;f__Erysipelotrichaceae;g__Dubosiella	0	0	0	0	0	0	0	0	0	0	0	0	0	0	0	0.00139185	0.000467914	0	0	0	0.000426257	0	0	0.000347544	0.00942718	0.0384346	0.14609	0.0329928	0.0260087	0.0538961	0.000972598	0	0	0	0	0
	k__Bacteria;p__Firmicutes;c__Erysipelotrichia;o__Erysipelotrichales;f__Erysipelotrichaceae;g__Faecalibaculum	0.0320005	0.037917	0.124302	0.0252673	0.0111228	0.00933112	0.16989	0.222563	0.0495299	0.142309	0.163974	0.0304706	0.090017	0.0305508	0.234294	0.273082	0.307754	0.100198	0.00703195	0.0288021	0.10779	0.231323	0.171194	0.156935	0.0164447	0.145357	0.149203	0.0663917	0.0842337	0.0368318	0.162086	0.0429872	0.186075	0.0188912	0.0179238	0.0689091
	k__Bacteria;p__Firmicutes;c__Erysipelotrichia;o__Erysipelotrichales;f__Erysipelotrichaceae;g__Turicibacter	0.0958796	0.0715971	0.101136	0.0126991	0.00240493	0.00650487	0.00200658	0.0203806	0.000642055	0.0256299	0.00724863	0.168462	0.189813	0.120358	0.117197	0.0157743	0.0125	0.013392	0.237826	0.251096	0.00559463	0.000817394	0.207709	0.268536	0.00287466	0.00754667	0.0162491	0.00862311	0.00573606	0.00736636	0.0397919	0.0200607	0.0103605	0.0245529	0.046826	0.156408
	k__Bacteria;p__Firmicutes;c__Erysipelotrichia;o__Erysipelotrichales;f__Erysipelotrichaceae;g__uncultured	0	0	0	0	0.000601233	0	0	0	0	0	0	0	0	8.52e-05	0	0	0	0	0	0	0	0	0	0.00019308	0	0	0	0	0	0.000337906	0	0	0	0	0	0
	k__Bacteria;p__Patescibacteria;c__Saccharimonadia;o__Saccharimonadales;f__Saccharimonadaceae;g__Candidatus Saccharimonas	0.0627819	0.0334656	0.0518551	0.0179795	0.0939426	0.0862231	0.0832729	0.0740373	0.0160514	0.0904165	0.0420938	0.0749151	0.0603735	0.129869	0.0657058	0.0579011	0.0539439	0.124557	0.0447931	0.0683177	0.0372975	0.0843551	0.0482738	0.0444084	0.0683576	0.0674525	0.0283979	0.0869185	0.0310376	0.0439616	0.0419063	0.0684761	0.0496714	0.123942	0.0392084	0.0266735
	k__Bacteria;p__Proteobacteria;c__Alphaproteobacteria;o__Rhodospirillales;f__uncultured;__	0	0	0.000188336	0	0	0	0	0	0	0	0	0	0.000169779	0	0	0	0.000467914	0	0	0	0.000639386	0	0.000150269	0.000115848	0.000169097	0	0	0	0.000353593	0	0	0	0.000592031	0	0	0.000363317
	k__Bacteria;p__Proteobacteria;c__Alphaproteobacteria;o__Rhodospirillales;f__uncultured;g__gut metagenome	0	0	0	0	0	0	0	0	0	0	0	0.00131004	0	0	0	0	0	0.000335733	0	0.000199322	0	0	0	0	0.000169097	0	0	0	0	0	0	0	0	0	0	0
	k__Bacteria;p__Proteobacteria;c__Deltaproteobacteria;o__Desulfovibrionales;f__Desulfovibrionaceae;g__Desulfovibrio	0.00700963	0.0793736	0.0458284	0.00174558	0.0220953	0.0776995	0.147372	0.0149698	0.00137583	0.00253134	0.0098892	0.00621058	0.00438031	0.0415673	0.0429423	0.127587	0.0222594	0.084754	0.00751971	0.0668228	0.00799233	0.0302845	0.0163793	0.0113531	0.00579159	0.0130564	0.00649203	0.00843566	0.00750403	0.00631885	0.00634303	0.088503	0.00745959	0.0683895	0.00104556	0.0264616
	k__Bacteria;p__Proteobacteria;c__Gammaproteobacteria;o__Betaproteobacteriales;f__Burkholderiaceae;g__Parasutterella	0	0	0	0.0014401	0	0	0	0	0	0	0.000724863	0	0	5.68e-05	0.000298211	0	0	0	0	0	0.00255755	0	0	0	0	0	0.00022779	0.000187459	0.000667898	0	0	0	0	0.000672683	0.000522778	0.00227073
	k__Bacteria;p__Proteobacteria;c__Gammaproteobacteria;o__Enterobacteriales;f__Enterobacteriaceae;g__Escherichia-Shigella	0.000670486	0	0.000188336	0.00091643	0.000751541	0.000493473	0.00128198	0.00108215	0.000321027	0.000751493	0.000724863	0.000921883	0.00125637	0.000653038	0	0	0.000467914	0.00130563	0.000772295	0.00274068	0.000372975	0.00277914	0	0.00100402	0.00169097	0.00243764	0.00106302	0.00243697	0.000864338	0.000810975	0.000888024	0.000337154	0.00497306	0.00493301	0.00149365	0.000363317
	k__Bacteria;p__Proteobacteria;c__Gammaproteobacteria;o__Enterobacteriales;f__Enterobacteriaceae;g__Proteus	0	0	0	0	0	0	0	0	0	0	0	0.000970403	0	0	0	0	0	0	0	0.000199322	0	0	0.000864044	0	0	0	0	0	0	0	0	0	0	0	0	0
	k__Bacteria;p__Proteobacteria;c__Gammaproteobacteria;o__Pseudomonadales;f__Pseudomonadaceae;g__Pseudomonas	0.000121907	0	0	0	0	0.000224306	0.000613121	0.000360718	0	0.000118657	0.000517759	0	0.00040747	0.000255537	0	0	0	0	0.000162588	0.000498306	0	0.000653915	0	0.000231696	0.000126823	0.000367316	0	0.000281188	0	0	0.000126861	0.000134862	0.000355219	0.000168171	0	0
	k__Bacteria;p__Proteobacteria;c__Gammaproteobacteria;o__Xanthomonadales;f__Xanthomonadaceae;g__Stenotrophomonas	0.000243813	0	0.000376671	0	0.000450924	0.000583195	0.000891812	0.000901795	0.000183444	0.000830598	0	0.000485201	0.004618	0.00198751	0.00198807	0.00167022	0.000935829	0.00380498	0.00121941	0.00443492	0.00181159	0.00420958	0.00210376	0.00278035	0.00498837	0.00494206	0.00265755	0.0025307	0.00157152	0.0025343	0.00118403	0.00171949	0.00473625	0.000840854	0.0012696	0.0016652
	k__Bacteria;p__Tenericutes;c__Mollicutes;o__Mollicutes RF39;__;__	0	0	0.000565007	0	0	0	0.000167215	0	0.00220133	0.000988807	0	0.0014556	0.000169779	0.000397501	0.000497018	0	0.000802139	0.000522252	0	0	0	0	0.000413239	0.000347544	0	0.000367316	0	0	0.000510745	0.000304116	0.000211434	0	0	0	0.00179238	0
	k__Bacteria;p__Tenericutes;c__Mollicutes;o__Mollicutes RF39;f__uncultured Lachnospiraceae bacterium;g__uncultured Lachnospiraceae bacterium	0	0	0	0	0	0.00076264	0	0	0	0.00118657	0.00124262	0	0	0	0.000994036	0	0	0	0	0	0.000745951	0	0	0.000231696	0	0	0	0	0	0	0	0	0.00100645	0	0	0.000242211
	k__Bacteria;p__Tenericutes;c__Mollicutes;o__Mollicutes RF39;f__uncultured bacterium;g__uncultured bacterium	0.000487626	0	0	0	0.00195401	0	0	0.000450897	0	0	0	0.000339641	0	0	0	0	0.000735294	0.000223822	0	0	0.000372975	0	0	0	0.000718664	0.000901593	0	0.000499891	0	0	0	0.000303439	0.000355219	0	0	0
	k__Bacteria;p__Verrucomicrobia;c__Verrucomicrobiae;o__Verrucomicrobiales;f__Akkermansiaceae;g__Akkermansia	0.0188955	0.0172155	0.0474606	0.153568	0.0118743	0.0013907	0.0317708	0.00595184	0.0406787	0.00652612	0.0117014	0.00388161	0.0207131	0.103691	0.02167	0.0194859	0.0510695	0.030216	0.0269084	0	0.0127344	0.00155305	0.02378	0.00100402	0.0658635	0.0198684	0.014161	0.0149655	0.0243193	0.0373387	0.00118403	0.00182063	0.00580191	0.00100902	0	0.0798995
Fig. 3D		Firmicutes						Bacteroidetes						Actinobacteria						Patescibacteria						Proteobacteria						Verrucomicrobia						Tenericutes						Deferribacteres
	Control	54.2972	44.6316	58.767	47.2354	45.0849	55.6772	35.804	39.7833	25.7894	34.7545	39.997	25.4453	0.877728	2.32758	0.797288	0.336024	1.65339	1.52528	6.27819	3.34656	5.18551	1.79795	9.39426	8.62231	0.804584	7.93736	4.65817	0.410212	2.32978	7.90005	1.88955	1.72155	4.74606	15.3567	1.18743	0.13907	0.048763	0	0.056501	0	0.195401	0.076264	0	0.252065	0	0.109099	0.157824	0.614598
	CUMS	47.5837	66.1015	71.8138	72.0801	48.7781	69.9466	19.0179	16.0519	19.1011	8.47605	31.5419	18.5298	6.80564	8.07106	3.0039	9.10889	12.975	2.47453	8.32729	7.40373	1.60514	9.04165	4.20938	7.49151	15.0159	1.73145	0.18803	0.423209	1.18567	0.989811	3.17708	0.595184	4.06787	0.652612	1.17014	0.388161	0.016721	0.04509	0.220133	0.217537	0.124262	0.179525	0.055738	0	0	0	0.015533	0
	FHLJDQ3M5	56.489	43.5236	63.6382	47.4529	49.3249	41.8174	28.4754	25.548	20.6262	27.7535	34.5388	25.8664	5.8268	3.0011	2.326	4.0642	2.9412	7.6958	6.0374	12.9869	6.5706	5.7901	5.3944	12.4557	1.0832	4.452	4.5229	12.9257	2.4131	9.02	2.0713	10.3691	2.167	1.9486	5.107	3.0216	0.017	0.0398	0.1491	0	0.1537	0.0746	0	0.0795	0	0.065	0.127	0.0485
	1025-low	54.7476	57.8682	56.0635	62.5388	53.969	60.9399	35.0134	16.1152	36.12	21.9143	32.0673	27.2629	2.05268	11.6703	1.17221	3.16331	4.756	5.64952	4.47931	6.83177	3.72975	8.43551	4.82738	4.44084	0.967401	7.48954	1.33738	3.79271	1.94973	1.5485	2.69084	0	1.27344	0.155305	2.378	0.100402	0	0	0.111893	0	0.041324	0.057924	0.048777	0.024915	0	0	0	0
	1025-mid	26.6413	61.3918	45.1481	64.4234	43.3544	52.8823	55.5189	20.9537	45.6416	19.1646	45.3542	28.7727	2.99302	6.59498	3.9104	4.78645	4.59278	9.21809	6.83576	6.74525	2.83979	8.69185	3.10376	4.39616	1.2936	2.08034	1.04404	1.3872	1.09614	0.966412	6.58634	1.98684	1.4161	1.49655	2.43193	3.73387	0.071866	0.126891	0	0.049989	0.051075	0.030412	0.025365	0.120212	0	0	0.015715	0
	1025-high	51.3532	35.8935	52.3415	28.5891	45.3622	31.0878	34.7471	38.0782	28.9207	42.9677	48.118	40.852	8.69418	9.80782	11.2427	8.40854	1.98656	14.239	4.19063	6.84761	4.96714	12.3942	3.92084	2.66735	0.854195	9.06945	1.81162	7.50042	0.433159	3.11242	0.118403	0.182063	0.580191	0.100903	0	7.98995	0.021143	0.030344	0.136167	0	0.179238	0.024221	0.021143	0.091032	0	0.03924	0	0.027249
Fig. 3E	Control	CUMS	FHLJDQ3M5	1025-low	1025-mid	1025-high
	36.0395	18.9665	28.2234	35.2982	55.5277	34.7093
	39.9317	16.0751	25.5193	16.0972	20.8482	38.5071
	26.0052	19.2447	20.9372	36.1566	45.4439	28.8039
	35.4621	8.5355	27.233	21.8064	19.2026	42.9006
	40.2973	31.5449	34.1385	32.1291	45.4021	48.3975
	25.8022	18.516	25.984	27.2942	28.7931	40.7939
Fig. 3F	Control	CUMS	FHLJDQ3M5	1025-low	1025-mid	1025-high
	54.0317	57.7113	56.7496	54.3543	26.6672	51.3022
	44.3222	66.0977	43.4604	57.9661	61.6984	35.1222
	58.4183	71.5959	63.2643	56.1739	45.3871	52.4528
	46.103	71.9791	48.4385	62.7275	64.3596	28.668
	44.5808	48.7855	49.9803	54.0232	43.2553	45.1025
	55.0182	70.1538	41.5819	60.8817	52.8529	31.1141
Fig. 3G	Control	CUMS	FHLJDQ3M5	1025-low	1025-mid	1025-high
	54.0317	57.7113	56.7496	54.3543	26.6672	51.3022
	44.3222	66.0977	43.4604	57.9661	61.6984	35.1222
	58.4183	71.5959	63.2643	56.1739	45.3871	52.4528
	46.103	71.9791	48.4385	62.7275	64.3596	28.668
	44.5808	48.7855	49.9803	54.0232	43.2553	45.1025
	55.0182	70.1538	41.5819	60.8817	52.8529	31.1141
Fig. 3H	Control	CUMS	FHLJDQ3M5	1025-low	1025-mid	1025-high
	1.49924	3.0428	2.01073	1.53986	0.48025	1.47805
	1.10995	4.11181	1.70304	3.601	2.95941	0.912097
	2.24641	3.72029	3.02162	1.55363	0.99875	1.82103
	1.30006	8.43291	1.77867	2.87656	3.35161	0.668242
	1.1063	1.54654	1.46405	1.68144	0.952716	0.931918
	2.13231	3.78882	1.60029	2.23057	1.83561	0.762715

## Sheet: Fig. 4
Fig. 4A-C	Name	Group	beta-Muricholic acid	Deoxycholic Acid	Lithocholic Acid	Docosapentaenoic acid methyl ester	Asiatic acid	Docosahexaenoic acid ethyl ester	4-Methylphenol	2-Methylbenzoic acid	Docosahexaenoic acid methyl ester	Oleamide	N1-(4-methylidene-3-thia-1-azaspiro[4.5]dec-2-yliden)-2-chloroaniline	3-pentadecyl-4,5,6,7-tetrahydrobenzo[d]isoxazol-4-one oxime	N-Acetylhistamine	3-Methylsalicylic acid	Pentadecanoic acid	N-Methylcaprolactam	Hexadecanamide	beta-Hydroxythiofentanyl	Undecanoic acid	Syringic acid	Tridecylic acid	Docosatrienoic acid	DL-Lactic Acid	Cytosine	5-Methyl-1-phenyl-4-[1-(thien-2-oyl)pyrazol-5-yl]pyrazole	Isobutyric acid	(2S,4aS,6aS,6bR,10S,12aS,14bS)-10-hydroxy-2,4a,6a,6b,9,9,12a-heptamethyl-13-oxo-1,2,3,4,4a,5,6,6a,6b,7,8,8a,9,10,11,12,12a,12b,13,14b-icosahydropicene-2-carboxylic acid	Propionylcarnitine	4-Indolecarbaldehyde	Oleanolic acid	Adenine	N-Acetylputrescine	5-Hydroxyindole-3-acetic acid	Adenosine	Indole-3-lactic acid	Sinapinic acid	Phenylacetaldehyde	8-Hydroxyquinoline	N-Formylmethionine	Ferulic acid	5-Aminovaleric acid	D(+)-Phenyllactic acid	ILK	3-Hydroxybutyric acid	VLK	Taurochenodeoxycholic acid	Salicylic acid
	X6	CCFM1025	9.05883e+08	469340079	45205361	17873822	259652	185406127	4.80493e+07	1.12021e+07	3.29023e+07	3.02577e+08	3.15535e+07	165086	1.74942e+08	9.00065e+07	5.6649e+08	8.60005e+08	5.31025e+07	1.41697e+06	4.84974e+07	2.04486e+07	1.21604e+08	8.57784e+06	541411869	7.95605e+07	1.50973e+08	2.4573e+07	1.32752e+06	2.9133e+07	1.77655e+08	866386	6.08718e+07	4.85167e+08	1.39323e+08	1.49113e+07	3.44307e+07	3.95944e+07	7.70667e+07	9.91229e+07	5.46785e+07	9.39923e+07	1.16284e+08	1.50993e+08	1.23917e+07	2.73717e+07	1.16568e+07	4.55039e+07	2.81816e+07
	X7	CCFM1025	8.41445e+08	470390993	45283514	16568244	238379	1.21646e+08	3.99161e+07	1.52762e+08	2.81876e+07	10918172645	3.6335e+07	179462	1.82237e+08	7.43344e+07	4.18603e+08	1055845504	1148830323	1.01e+06	4.25605e+07	2.02759e+07	1.1033e+08	7.49534e+06	5.15519e+08	7.7042e+07	1.37947e+08	7.55863e+07	719267	2.10721e+07	2.33307e+08	909092	5.4558e+07	5.99225e+08	176271681	1.09385e+07	2.85543e+07	1.82063e+07	4.73371e+07	1.17465e+08	5.74199e+07	3.97867e+07	9.74422e+07	9.30854e+07	8.69956e+06	3.60959e+07	7.9683e+06	1.72521e+07	3.03154e+07
	X8	CCFM1025	1049876006	483696115	45535260	23460536	267934	1.36508e+08	3.53831e+07	4.4978e+06	3.85763e+07	1.067e+08	3.17865e+07	154515	1.39783e+08	6.46929e+07	2.66803e+08	872334517	4.18921e+07	732864	1.10115e+07	1.62536e+07	5.66212e+07	6.8292e+06	1020864386	7.65085e+07	1.30846e+08	3.04298e+07	1.59168e+06	4.32872e+07	1.84515e+08	858249	5.04215e+07	5.58299e+08	1.47385e+08	1.10562e+07	2.59896e+07	3.70048e+07	7.92137e+07	9.781e+07	3.42516e+07	89243788	9.08257e+07	1.52749e+08	1.21989e+07	3.38795e+07	1.05602e+07	3.58112e+07	2.12628e+07
	X9	CCFM1025	1444936124	500649866	45925344	30875096	6.90041e+07	2.39628e+08	4.71294e+07	6.98725e+06	4.92794e+07	2.46233e+08	3.1188e+07	93465	1.58489e+08	9.20523e+07	2.81385e+08	8.31275e+08	5.03387e+07	2.42628e+07	2.38385e+07	3.53893e+07	6.0228e+07	1.2706e+08	1.66214e+08	9.06358e+07	1.51801e+08	1.93621e+08	1.55776e+07	6.37029e+06	1.82871e+08	2.58799e+07	4.71862e+07	4.65797e+08	1.48427e+08	1.0735e+07	2.48132e+07	2.04821e+07	5.66637e+07	1.18455e+08	1.27171e+08	9.92946e+07	1.47912e+08	7.64828e+07	1.13382e+07	1.06496e+07	9.96438e+06	8.27477e+07	2.05057e+07
	X10	CCFM1025	1038099010	1018165143	107403891	25754593	6.20089e+06	9.79082e+08	1.13732e+08	1.65576e+08	4.61325e+07	4920543396	3.72305e+07	7.96469e+06	1.3353e+08	203445633	3.22666e+08	631360987	2.32545e+08	6.34456e+06	1.84433e+07	7.05822e+06	8.03559e+07	8.26301e+06	8.05584e+08	8.9194e+07	1.20815e+08	9.84866e+07	2.76642e+06	1.31125e+07	1.24473e+08	7.37286e+06	3.55668e+07	3.94041e+08	108526435	9.0307e+06	4.84397e+07	8.92186e+06	4.50232e+07	7.52677e+07	3.6319e+07	2.99048e+07	1764687772	8.83796e+07	1.57304e+07	3.43139e+07	7.52826e+06	9.59401e+07	1.53113e+07
	X11	FHLJDQ3M5	3.0628e+06	2769179	469219	163805	119585	4.00601e+06	1.72449e+06	1.96299e+06	1.28454e+06	10861389481	1.41304e+06	128439	6.23657e+07	6.93611e+06	9.20148e+07	104737640	1053111899	1.05424e+06	1.4561e+07	3.96188e+06	2.46596e+07	6.67693e+06	2.73913e+08	2.8505e+07	52258387	3.151e+07	482924	5.03323e+07	3.81751e+07	962996	1.73444e+07	2.44146e+08	3.45149e+07	2.80928e+07	1.29543e+07	6.7831e+06	2.47422e+07	2.72494e+07	1.24349e+07	1.90544e+07	6.52095e+07	4.81502e+07	7.54874e+06	1.95492e+07	1.20672e+07	6.11459e+06	9.27604e+06
	X12	FHLJDQ3M5	5.21071e+06	1761620	283518	156795	221755	2.65617e+06	1.02108e+06	3.21514e+06	1.04924e+06	165880556	1.0946e+06	63332.7	1.55145e+08	6.00443e+06	1.0414e+08	2.26014e+08	4.2692e+07	3.24402e+06	7.82438e+06	3.87827e+06	1.69639e+07	4.80874e+06	8.44659e+08	3.89242e+07	6.06702e+07	2.55083e+07	1.71504e+06	4.31621e+07	4.04898e+07	905358	2.20442e+07	4.23279e+08	3.74609e+07	3.44543e+07	2.24027e+07	7.70359e+06	4.52145e+07	2.89315e+07	1.07314e+07	2.21848e+07	7.46278e+07	8.80118e+07	4.93234e+06	3.95405e+07	5.63815e+06	5.96352e+06	7.84869e+06
	X13	FHLJDQ3M5	6.77089e+06	2918878	242998	155274	162912	4.62922e+06	1.12673e+06	2.34762e+06	872278	11051644937	1.15273e+06	131010	4.80187e+07	5.40786e+06	6.63514e+07	8.69044e+07	8.96293e+08	1.21651e+06	7.9053e+06	2.84895e+06	1.99465e+07	5.78388e+06	1.58703e+08	1.94254e+07	4.61644e+07	3.73904e+07	804735	4.99791e+06	3.82932e+07	2.23211e+06	1.30192e+07	1.883e+08	3.84617e+07	8.67489e+06	1.33546e+07	1.33446e+07	2.03958e+07	2.9441e+07	1.06579e+07	2.27727e+07	7.26379e+07	3.80833e+07	2.12843e+06	1.11907e+07	2.14229e+06	8.99728e+06	6.13772e+06
	X14	FHLJDQ3M5	6.83448e+06	2273588	319590	165958	289593	3.33864e+06	2.38785e+06	2.98144e+06	1.23521e+06	6128853184	1.41553e+06	82435.1	5.45348e+07	6.31193e+06	4.46464e+07	1.0223e+08	2.79007e+08	1.72252e+06	6.21758e+06	4.69561e+06	2.82658e+07	5.78898e+06	1.45305e+08	2.10183e+07	4.25449e+07	5.79331e+07	1.50236e+06	1.03722e+07	4.70248e+07	895016	1.4107e+07	2.54514e+08	4.29574e+07	6.82481e+06	1.32366e+07	1.1368e+07	2.5441e+07	3.12167e+07	1.49276e+07	2.55258e+07	7.00168e+07	4.856e+07	2.94553e+06	1.69387e+07	3.27412e+06	7.4643e+06	8.73151e+06
	X15	FHLJDQ3M5	2.24484e+07	4480649	530348	342392	266456	8.49688e+06	1.08562e+06	2.41468e+06	1.55136e+06	4.72595e+08	1.81005e+06	78141.8	4.57682e+07	5.7652e+06	4.74666e+07	1.14874e+08	5.13756e+07	1.73982e+06	1.71695e+07	3.1584e+06	3.28535e+07	8.03749e+06	1.90846e+08	2.70039e+07	4.69607e+07	3.95814e+07	1.93538e+06	2.79734e+07	4.14798e+07	1.59582e+06	1.61563e+07	2.28338e+08	3.65834e+07	8.98327e+06	1.07317e+07	8.47215e+06	2.15132e+07	2.8912e+07	1.15108e+07	2.15389e+07	1.11921e+08	4.11471e+07	5.4295e+06	1.27664e+07	1.06326e+07	3.37608e+07	6.02937e+06
	X1	Control	7.2645e+06	3027811	269108	185520	62766.4	9.81348e+06	1.15216e+06	2.14844e+06	1.84451e+06	1.53783e+08	908254	68071.4	7.18451e+06	5.83023e+06	2.0266e+07	5.60537e+07	5.06416e+07	1.92708e+06	5.29727e+06	3.75459e+06	2.27096e+07	7.63213e+06	1.70338e+08	2.79119e+07	3.84565e+07	2.47704e+07	1.01324e+06	7.06626e+06	4.33586e+07	2.3975e+06	2.00471e+07	1.28476e+08	4.04781e+07	3.5165e+06	8.6427e+06	6.29606e+06	1.49469e+07	3.51358e+07	3.08638e+07	2.07537e+07	1.42188e+08	2.81761e+07	5.54979e+06	1.0669e+07	7.48035e+06	5.17421e+07	7.29944e+06
	X2	Control	3.66882e+06	1644045	176898	167617	90446.3	3.06418e+06	969708	2.23042e+06	1.58248e+06	1.24335e+08	1.43709e+06	75082.7	5.73238e+06	6.09101e+06	2.26314e+07	5.58454e+07	4.3851e+07	764625	4.82178e+06	4.71405e+06	1.35678e+07	5.61642e+06	1.51056e+08	1.77533e+07	3.63706e+07	2.45784e+07	571113	5.54189e+06	5.23331e+07	3.25116e+06	1.10086e+07	132665677	4.34206e+07	5.16965e+06	1.08038e+07	1.03819e+07	2.16574e+07	3.82751e+07	2.69334e+07	2.61004e+07	1.11619e+08	4.17024e+07	3.78526e+06	1.12078e+07	2.63192e+06	7.68876e+06	9.32375e+06
	X3	Control	3.01776e+06	3631101	284979	170314	76977.4	5.44146e+06	1.75079e+06	2.70782e+06	776281	1.02905e+08	953442	77428.8	7.12757e+06	4.50308e+06	2.72431e+07	7.42513e+07	4.85243e+07	709835	6.95608e+06	3.8798e+06	1.59628e+07	6.92524e+06	174221935	1.83139e+07	3.11875e+07	2.03382e+07	1.48675e+06	8.09127e+06	5.09959e+07	1.96435e+06	1.48453e+07	1.45709e+08	4.55449e+07	4.1087e+06	1.31948e+07	8.50173e+06	2.80686e+07	3.5476e+07	2.14167e+07	2.54373e+07	239808059	5.37975e+07	6.26803e+06	1.40448e+07	4.19733e+06	2.30235e+07	1.05533e+07
	X4	Control	5.66788e+06	1906487	268806	168598	284906	2.80016e+06	1.11747e+06	2.21787e+06	1.48289e+06	163010129	1.50198e+06	77745.7	1.1935e+07	6.51186e+06	2.27724e+07	8.56875e+07	3.95101e+07	1.15994e+06	6.23465e+06	3.70513e+06	2.19811e+07	9.22813e+06	1.07375e+08	1.67404e+07	3.79984e+07	2.4251e+07	1.36746e+06	4.96903e+06	5.36505e+07	1.51723e+06	1.19596e+07	1.90524e+08	4.96915e+07	2.70966e+06	1.14957e+07	8.10652e+06	2.44607e+07	3.67448e+07	1.50373e+07	2.6401e+07	1.94547e+08	4.70826e+07	2.91733e+06	9.76652e+06	2.26124e+06	1.84238e+07	7.28607e+06
	X5	Control	2.68958e+06	7261486	783110	161726	120730	4.88784e+06	1.68866e+06	2.0519e+06	1.23176e+06	1.34293e+08	2.19156e+06	78247.4	9.60395e+06	7.25041e+06	2.8274e+07	7.59059e+07	4.0376e+07	771241	4.51078e+06	3.56371e+06	1.59472e+07	6.40247e+06	1.03874e+08	1.92727e+07	2.58838e+07	1.28551e+07	1.31887e+06	4.15276e+06	4.55893e+07	1.09579e+06	1.42442e+07	1.41011e+08	3.92939e+07	2.57299e+06	9.19191e+06	7.91156e+06	1.6344e+07	3.12903e+07	1.3672e+07	2.41629e+07	1.06152e+08	3.11615e+07	3.85297e+06	8.94217e+06	1.94833e+06	8.0232e+06	1.17131e+07
Fig. 4D-E	Name	Group	β-Muricholic Acid	Phenylacetylglycine	4-Dodecylbenzenesulfonic acid	6-Hydroxycaproic acid	Isoleucine	Histamine	Taurochenodeoxycholic acid	Taurocholic acid	Indole-3-lactic acid	Propionylcarnitine	Methylmalonic acid	Myristyl sulfate	N-Acetyl-L-carnosine	Nicotinamide	L(-)-Carnitine	L-Glutamic acid	N6,N6,N6-Trimethyl-L-lysine	Gentisic acid	Nipecotic acid	3-Hydroxybutyric acid	2,4-Dimethylbenzaldehyde	Corticosterone	DL-Glutamine	L-Valine	D-(+)-Proline	D-(+)-Glucose	Creatine	Pyruvic acid	Bis(4-ethylbenzylidene)sorbitol	Hexanoylcarnitine	Acetyl-L-carnitine	DL-β-Leucine	DL-Lactic Acid	DL-Stachydrine	Uric acid	N6-Acetyl-L-lysine	1-Methylhistidine	Betaine	4-Oxoproline	6,6-dimethyl-4-piperidino-5,6-dihydro-2H-thiine-2-thione	L(+)-Ornithine	5-Aminovaleric acid	Testosterone	DL-2-(acetylamino)-3-phenylpropanoic acid	DL-Arginine	L-Threonine	DL-Lysine
	X6	CCFM1025	9.22636e+06	6.09423e+06	5.62404e+06	1.91528e+07	3.86396e+08	8.20929e+06	411207	4.72331e+06	9.81221e+06	3.49431e+07	2.62169e+07	1.52718e+06	3.55878e+06	4.0755e+07	4.12087e+08	3.44771e+07	1.01146e+07	1.61765e+07	8.20733e+07	3.96729e+07	7.96125e+07	2.16345e+07	9.06728e+07	2.83619e+08	2.15582e+08	1.59297e+08	5.46442e+08	4.07639e+07	7.78495e+08	4.43822e+06	3.53695e+08	1.4023e+08	2.09976e+09	1.35148e+08	1.09076e+08	8.46746e+06	1.53921e+07	1.98021e+08	1.87682e+07	9.52426e+06	5.74576e+06	6.96147e+07	175242	2.26753e+06	1.66729e+08	2.37e+07	6.04645e+07
	X7	CCFM1025	8.75895e+06	5.05073e+06	2.74928e+06	1.56294e+07	2.00971e+08	1.02399e+07	808434	7.04684e+06	8.78643e+06	2.04841e+07	2.54624e+07	2.01831e+06	7.90381e+06	4.64305e+07	3.7504e+08	2.44585e+07	1.08362e+07	9.41156e+06	7.53261e+07	1.00456e+08	7.68104e+07	1.84165e+07	8.23214e+07	2.4857e+08	1.30432e+08	1.98091e+08	4.04217e+08	3.54515e+07	9.46545e+08	1.19783e+07	4.16085e+08	9.62282e+07	1.71963e+09	9.73633e+07	1.12046e+08	7.04125e+06	1.36678e+07	1.79747e+08	1.75233e+07	7.53923e+06	2.80136e+06	5.32954e+07	3.41784e+06	1.70027e+06	1.27446e+08	1.46237e+07	5.42293e+07
	X8	CCFM1025	2.07357e+07	5.97833e+06	9.39897e+06	1.63282e+07	2.62993e+08	1.03532e+07	4.69943e+06	3.18556e+07	7.72148e+06	2.58824e+07	4.5213e+07	1.86684e+06	425392	4.94214e+07	4.26767e+08	2.8891e+07	9.68996e+06	2.09546e+07	8.77521e+07	3.84254e+07	7.87969e+07	1.83183e+07	8.47018e+07	2.76796e+08	1.74883e+08	1.90019e+08	3.63053e+08	4.28461e+07	9.04473e+08	6.49943e+06	3.7908e+08	1.0712e+08	2.23192e+09	1.63375e+08	1.22701e+08	1.01203e+07	1.50292e+07	2.26346e+08	1.56308e+07	9.00045e+06	3.17178e+06	5.80139e+07	154890	1.74292e+06	1.3825e+08	2.12453e+07	6.61813e+07
	X9	CCFM1025	8.57478e+06	8.78462e+06	3.46762e+06	1.52357e+07	2.20211e+08	1.08846e+07	724546	2.96996e+06	7.27644e+06	2.54864e+07	4.48047e+07	1.79132e+06	1.20766e+06	4.59458e+07	4.11652e+08	3.10993e+07	8.09868e+06	1.42044e+07	9.29526e+07	7.21479e+07	7.72518e+07	1.7923e+07	8.43436e+07	2.56698e+08	1.41822e+08	2.17917e+08	3.17992e+08	3.8533e+07	8.30185e+08	1.23929e+07	3.49976e+08	9.7191e+07	1.93972e+09	1.21371e+08	1.23532e+08	8.55757e+06	1.84794e+07	1.58811e+08	1.89648e+07	7.83262e+06	2.98615e+06	5.49822e+07	163668	2.30057e+06	1.2644e+08	1.39949e+07	5.51373e+07
	X10	CCFM1025	3.69764e+06	1.49987e+07	7.59127e+06	1.7454e+07	2.11688e+08	1.60165e+07	521995	2.35474e+06	8.39914e+06	2.03268e+07	2.57807e+07	1.78442e+06	3.1056e+06	4.23768e+07	4.00352e+08	2.52776e+07	1.146e+07	7.32112e+06	7.74623e+07	9.20574e+07	7.2999e+07	1.81184e+07	7.72557e+07	2.09253e+08	1.21127e+08	2.67573e+08	2.86446e+08	4.55196e+07	8.69013e+08	1.27263e+07	3.92025e+08	8.82515e+07	1.92552e+09	1.24725e+08	1.10437e+08	6.13444e+06	1.58888e+07	1.72195e+08	1.66088e+07	5.49849e+06	3.53939e+06	4.92352e+07	200373	1.20858e+06	1.29353e+08	1.2042e+07	6.03439e+07
	X11	FHLJDQ3M5	182272	905564	3.1683e+06	1.15965e+07	1.75829e+08	1.10758e+07	248780	3.08985e+06	6.74258e+06	1.58096e+07	2.36293e+07	1.13012e+06	2.15582e+06	3.9105e+07	3.09987e+08	2.07154e+07	7.18797e+06	5.58751e+06	5.42028e+07	7.85166e+07	6.89263e+07	2.29405e+07	6.52933e+07	1.84744e+08	9.39874e+07	1.6654e+08	3.35906e+08	3.40618e+07	7.64458e+08	7.24806e+06	3.25222e+08	9.30412e+07	1.58678e+09	8.78835e+07	7.91866e+07	4.28932e+06	9.94125e+06	1.36692e+08	1.43051e+07	5.48999e+06	1.70845e+06	5.18806e+07	94598.8	2.04636e+06	9.32921e+07	1.13626e+07	4.06872e+07
	X12	FHLJDQ3M5	224606	1.46422e+06	2.76414e+06	1.28863e+07	2.08735e+08	1.51953e+07	656518	6.88486e+06	5.96133e+06	2.23349e+07	2.35177e+07	1.60086e+06	2.66161e+06	4.3305e+07	4.23433e+08	1.9809e+07	1.11791e+07	5.21559e+06	8.02016e+07	8.90166e+07	8.51882e+07	1.63468e+07	7.05604e+07	2.27017e+08	1.04896e+08	1.96175e+08	3.34582e+08	3.47013e+07	8.91218e+08	8.0988e+06	3.81885e+08	7.69637e+07	1.43055e+09	9.27986e+07	8.97251e+07	8.10407e+06	1.36429e+07	1.59897e+08	1.44707e+07	6.18003e+06	2.25215e+06	4.55196e+07	405107	1.72197e+06	1.04309e+08	1.06614e+07	4.32915e+07
	X13	FHLJDQ3M5	249997	2.63886e+06	8.69153e+06	1.26139e+07	2.78245e+08	1.07159e+07	781802	7.77285e+06	7.01947e+06	1.70517e+07	1.84426e+07	1.82867e+06	2.26934e+06	4.97179e+07	3.92313e+08	1.91932e+07	9.00425e+06	1.25118e+07	7.86368e+07	6.31831e+07	8.94869e+07	2.34931e+07	7.05417e+07	2.44835e+08	1.10234e+08	1.85958e+08	2.84583e+08	3.49544e+07	1.02413e+09	6.68492e+06	3.26361e+08	1.0498e+08	1.44223e+09	1.42098e+08	9.24479e+07	7.84513e+06	1.68215e+07	1.58853e+08	1.47445e+07	7.74993e+06	2.23944e+06	5.76065e+07	1.9617e+06	2.87951e+06	1.04002e+08	1.23471e+07	3.57239e+07
	X14	FHLJDQ3M5	135580	1.23342e+06	3.77972e+06	1.14198e+07	2.88131e+08	1.27027e+07	175226	1.96641e+06	5.30619e+06	2.53231e+07	2.08883e+07	2.24315e+06	2.2402e+06	3.93785e+07	3.91787e+08	2.02684e+07	9.625e+06	5.25224e+06	5.85253e+07	8.3805e+07	9.22183e+07	2.15998e+07	8.18656e+07	2.4237e+08	1.12843e+08	1.5729e+08	4.82012e+08	4.32077e+07	9.17897e+08	8.12795e+06	4.09701e+08	1.13711e+08	1.80191e+09	9.98996e+07	8.3443e+07	5.09934e+06	1.27135e+07	1.56056e+08	1.61949e+07	6.73801e+06	2.48072e+06	6.43784e+07	3.60096e+06	1.63885e+06	1.5389e+08	1.05617e+07	6.13255e+07
	X15	FHLJDQ3M5	3.17303e+06	1.72916e+06	4.03259e+06	1.18996e+07	2.55891e+08	6.74178e+06	3.80183e+07	2.93568e+08	6.25739e+06	1.85977e+07	1.71055e+07	2.7024e+06	110934	4.61881e+07	3.38392e+08	2.16639e+07	6.69771e+06	2.62983e+07	6.11894e+07	3.25882e+07	8.4082e+07	1.57087e+07	8.9406e+07	3.0072e+08	2.28303e+08	1.91598e+08	3.3669e+08	3.82878e+07	9.70204e+08	2.00745e+06	2.39826e+08	1.33271e+08	1.69807e+09	1.81193e+08	7.27873e+07	7.61984e+06	1.05947e+07	3.68679e+08	1.72524e+07	1.22655e+07	5.53876e+06	8.11551e+07	190483	5.20187e+06	1.45774e+08	2.31185e+07	7.19045e+07
	X1	Control	157590	910431	2.37604e+06	1.02719e+07	1.50181e+08	6.41735e+06	289118	2.83768e+06	5.35463e+06	1.45227e+07	2.30552e+07	1.32192e+06	1.25952e+06	3.1034e+07	2.78113e+08	2.26622e+07	6.53551e+06	1.07201e+07	6.00058e+07	4.9632e+07	7.33467e+07	1.48135e+07	6.29476e+07	1.90021e+08	1.19999e+08	1.53169e+08	2.73363e+08	3.39105e+07	9.06005e+08	6.78442e+06	2.63592e+08	8.87693e+07	1.7829e+09	9.69645e+07	8.68895e+07	5.73501e+06	1.20344e+07	1.4335e+08	1.6984e+07	5.45985e+06	3.70287e+06	5.52254e+07	599604	1.51984e+06	1.1565e+08	1.52519e+07	5.74069e+07
	X2	Control	415822	1.86173e+06	3.82938e+06	1.35326e+07	1.91053e+08	5.89662e+06	809511	1.10893e+07	7.15383e+06	2.42051e+07	2.88468e+07	1.3353e+06	2.56732e+06	3.08134e+07	4.77449e+08	2.94745e+07	1.31506e+07	8.98863e+06	8.64689e+07	4.56924e+07	6.62005e+07	1.38075e+07	9.73005e+07	2.70239e+08	1.65505e+08	1.81415e+08	4.74266e+08	3.9636e+07	5.89757e+08	8.91565e+06	4.30024e+08	8.22487e+07	1.90595e+09	1.24683e+08	1.37001e+08	1.00832e+07	1.8573e+07	2.11503e+08	1.9654e+07	1.04346e+07	5.97837e+06	5.1907e+07	550569	1.9798e+06	1.91327e+08	2.30703e+07	5.69424e+07
	X3	Control	261883	1.51588e+06	3.00886e+06	9.79059e+06	1.52261e+08	7.62466e+06	1.13737e+06	5.39026e+06	5.9969e+06	1.30701e+07	1.98103e+07	2.13795e+06	1.48105e+06	4.45477e+07	3.03811e+08	1.73256e+07	7.27437e+06	1.58834e+07	5.97186e+07	7.30376e+07	6.36326e+07	9.55257e+06	6.18677e+07	2.04544e+08	1.19634e+08	2.09597e+08	2.6276e+08	3.10056e+07	7.60925e+08	8.74498e+06	3.04389e+08	1.00428e+08	1.59755e+09	1.28354e+08	9.23487e+07	6.39604e+06	1.43876e+07	1.6919e+08	1.51463e+07	7.19312e+06	2.02285e+06	5.77321e+07	219129	2.31712e+06	1.12212e+08	1.5194e+07	5.40698e+07
	X4	Control	295067	1.26292e+06	3.46136e+06	9.46538e+06	1.54793e+08	8.19978e+06	2.10287e+06	1.03863e+07	5.26927e+06	1.9019e+07	2.3756e+07	1.20518e+06	4.17419e+06	3.64977e+07	2.74469e+08	1.90002e+07	6.68138e+06	1.02968e+07	6.62414e+07	6.0893e+07	6.58144e+07	1.93746e+07	6.15352e+07	1.9297e+08	1.14823e+08	1.82289e+08	3.1334e+08	3.47278e+07	8.59259e+08	9.17137e+06	3.15256e+08	8.59286e+07	1.59192e+09	1.09876e+08	9.83097e+07	5.8989e+06	1.23088e+07	1.58989e+08	1.53116e+07	6.31646e+06	2.76349e+06	5.14668e+07	2.13299e+06	1.44411e+06	1.03601e+08	1.28363e+07	5.09581e+07
	X5	Control	202628	1.55416e+06	2.95898e+06	1.21165e+07	2.24071e+08	1.03096e+07	847604	5.76083e+06	6.90565e+06	2.741e+07	3.75783e+07	1.18846e+06	3.52982e+06	4.05357e+07	3.40294e+08	3.1666e+07	8.52696e+06	1.17122e+07	7.93214e+07	6.12416e+07	6.17589e+07	2.35421e+07	7.69813e+07	2.42832e+08	1.58983e+08	1.68479e+08	3.42484e+08	3.93074e+07	7.2609e+08	9.15938e+06	3.82442e+08	1.17243e+08	2.09322e+09	1.23733e+08	1.14875e+08	8.87587e+06	1.53137e+07	1.93482e+08	1.66887e+07	8.46253e+06	3.14764e+06	5.99527e+07	483340	1.72619e+06	1.50081e+08	1.75962e+07	7.55516e+07
[truncated: 225 more columns]

## Sheet: Fig. 5
Fig. 5A		Control					FHLJDQ3M5					CCFM1025
	CA	0.019	0	0	0	0	0.126	0.161	0.116	0.084	0.299	26.91	59.14	123.3	9.496	23.22
	β-MCA	0.299	0.054	0.273	0.343	0.022	0.148	0.093	0.288	0.239	0.629	667.7	1488	3779	318.9	2963
	CDCA	0	0	0.053	0	0	0	0	0	0	0	0.425	1.083	1.283	0.033	1.649
	TCA	216.3	18.82	90.19	102.5	93.57	17.77	30.73	16.59	21.52	70.6	249.1	221.8	366	4.501	474.1
	T-β-MCA	338.3	42.94	398.7	437.4	204.9	34.59	41.67	34.32	45.26	127.9	793.3	638.8	1381	56.79	1392
	TCDCA	1.418	0.394	0.903	0.859	0.922	0.358	0.501	0.404	0.485	0.795	1.236	1.594	1.676	1.223	2.58
	DCA	0	0	0	0	0	0	0	0	0	0	0.117	0.569	1.852	0.19	55.83
	UDCA	0	0	0	0	0	0	0	0	0	0	2.968	3.912	22.74	0.433	9.249
	HDCA	0	0	0	0	0	0	0	0	0	0	0.054	0.119	0.714	0	0.501
	TDCA	0.704	0.115	0.988	1.024	0.604	0.106	0.165	0.108	0.111	0.293	1.41	1.623	7.928	0.356	6.536
	TUDCA	0	0	0	0	0	0	0	0	0	0	0	0	0	0	0
Fig. 5B		Control					FHLJDQ3M5					CCFM1025
	CA	0.418799	0.09445	0.047285	0.095718	0.077069	0.089453	0.087808	0.089215	0.071279	0.083941	0.924816	0.828284	0.748735	1.95602	0.313853
	β-MCA	0	0	0	0	0	0	0	0	0	0.042396	0.113066	0.104991	0.049302	0.165392	0.021301
	CDCA	0	0	0	0	0	0	0	0	0	0	0	0	0	0	0
	TCA	0.450418	0.762206	0.361081	0.796898	0.450729	0.315667	0.781969	0.616702	0.247082	0.58838	0.516741	0.675694	0.310629	2.11637	0.359368
	T-β-MCA	0.110834	0.445336	0.198597	0.498775	0.24439	0.107307	0.248977	0.267321	0.094348	0.13107	0.1828	0.264037	0.127864	1.2938	0.095563
	TCDCA	0	0	0	0	0	0	0	0	0	0	0	0	0	0	0
	DCA	0	0	0	0	0	0	0	0	0	0	0	0	0	0	0
	UDCA	0	0	0	0	0	0	0	0	0	0	0.18709	0.127276	0.090764	0.138128	0.029318
	HDCA	0	0	0	0	0	0	0	0	0	0	0	0	0	0	0
	TDCA	0	0	0	0	0	0	0	0	0	0	0	0	0	0	0
	TUDCA	0.206062	0.228193	0.224529	0.332466	0.222369	0.217417	0.219492	0.257248	0.182131	0.248174	0.192791	0.220762	0.171652	0.377815	0.134847

## Sheet: Fig. 6
Fig. 6A		MRS		TCA		TCDCA		TDCA		TUDCA
	2	0.0912	0.0887	0.0878	0.0866	0.0872	0.0897	0.0858	0.0895	0.0916
	4	0.0997	0.1024	0.1002	0.0975	0.0998	0.1003	0.0968	0.0969	0.1108
	6	0.1588	0.1682	0.1768	0.1722	0.1829	0.177	0.1749	0.1729	0.1919
	8	0.3285	0.3289	0.3514	0.3457	0.3344	0.3121	0.3202	0.3177	0.3562
	10	0.4155	0.4113	0.45	0.4409	0.4469	0.4347	0.4488	0.4407	0.4307
	12	0.4708	0.4688	0.5279	0.5163	0.5276	0.5134	0.5328	0.5256	0.4978
	14	0.5449	0.5526	0.6257	0.6087	0.6351	0.6172	0.6475	0.63	0.5871
	16	0.6071	0.619	0.6977	0.6766	0.7209	0.7013	0.7328	0.7177	0.6576
	18	0.6525	0.6654	0.7443	0.7205	0.7782	0.7562	0.7967	0.775	0.7043
	20	0.6877	0.6981	0.7723	0.7476	0.8139	0.7896	0.8297	0.811	0.7348
	22	0.7114	0.7224	0.7926	0.7663	0.8386	0.8133	0.8551	0.8363	0.76
	24	0.7269	0.7403	0.8046	0.7777	0.8542	0.8287	0.8789	0.8526	0.7796
	26	0.7347	0.7518	0.8104	0.7835	0.8625	0.8371	0.8828	0.8605	0.7941
	28	0.7321	0.7607	0.8135	0.7868	0.8678	0.8423	0.8872	0.8642	0.8021
Fig. 6B		MRS		TCA		TCDCA		TDCA		TUDCA
	2	0.0756	0.0774	0.076	0.0756	0.0746	0.0774	0.0735	0.0778	0.0764	0.0777
	4	0.0836	0.0892	0.0898	0.0908	0.0909	0.0951	0.0895	0.0938	0.0838	0.0854
	6	0.1077	0.1294	0.1388	0.1422	0.1489	0.1548	0.1436	0.1426	0.105	0.1069
	8	0.1778	0.2222	0.2427	0.2501	0.2667	0.2742	0.2541	0.2484	0.1656	0.1681
	10	0.3617	0.3942	0.423	0.4321	0.444	0.4506	0.4191	0.4183	0.3351	0.3373
	12	0.4579	0.4808	0.5129	0.5207	0.5289	0.5355	0.4856	0.4856	0.4223	0.4235
	14	0.5483	0.5503	0.577	0.5809	0.5852	0.592	0.5364	0.5402	0.512	0.5135
	16	0.5984	0.5734	0.5981	0.6004	0.6081	0.6166	0.5634	0.5699	0.5615	0.5633
	18	0.6299	0.58	0.6058	0.6072	0.6201	0.6307	0.5776	0.5865	0.5877	0.5901
	20	0.6449	0.5796	0.6077	0.6081	0.6267	0.6372	0.5832	0.5924	0.5994	0.6015
	22	0.6467	0.5792	0.6089	0.6097	0.6311	0.6425	0.5899	0.5984	0.6026	0.604
	24	0.6406	0.5781	0.6133	0.6144	0.6386	0.6504	0.6068	0.6141	0.6011	0.6028
	26	0.6328	0.5793	0.6257	0.6282	0.652	0.6653	0.6284	0.6336	0.6043	0.6063
	28	0.629	0.5854	0.6451	0.648	0.6699	0.6832	0.6517	0.6545	0.6019	0.6042
Fig. 6C			FHLJDQ3M5			CCFM1025
		TCA	72.56	70.87	72.82	100	100	100
		TDCA	95.69	95.79	95.63	100	100	100
		TCDCA	96.77	96.5	96.59	100	100	100
		TUDCA	70.24	67.14	66.96	100	100	100
Fig. 6D		Control	CUMS	FHLJDQ3M5	1025-low	1025-mid	1025-high
		0.061	0.401	0	0.123	0.396	0.289
		0	0.163	0	0.115	0.387	3.238
		0.684	0	0	0	0.042	1.06
		0.049	0.17	0.014	0	0.073	2.555
		0	0.067	0.028	0.249	0	1.819
		0.046	1.684	0	0.07	0.067	2.341
Fig. 6F		Control	CUMS	FHLJDQ3M5	1025-low	1025-mid	1025-high
		0	0	0	0	0	0
		0	0	0	0	0.086	0.125
		0	0	0	0	0	0
		0	0	0	0	0	0.037
		0	0	0	0	0	0
		0	0	0	0.01	0	0
